# Supplementary material for: PTEN controls glandular morphogenesis through a juxtamembrane β-Arrestin1/ARHGAP21 scaffolding complex
Source: eLife. 2017 Jul 27;6:e24578. doi: 10.7554/eLife.24578 (PMC5576923; doi:10.7554/eLife.24578)
Supplement: Figure 1—figure supplement 2—source data 1. [file elife-24578-fig1-figsupp2-data1.xlsx]

## Sheet: Sheet1
Figure 1 Supplement 2: β-Arrestin1 and ARHGAP21 expression (ADU) in PTEN+/+ and PTEN-/- HCT116 cells. Experiments in triplicates.								Mean and SEM values for β-Arrestin1 expression
	Control			PTEN-/-					Mean	Standard error		Student's ttest on β-Arrestin1 expression
β-Arrestin1	1	1	1	0.686234	0.750857	0.907891		Control	1	0		P value	0.0589	ns
ARHGAP21	1	1	1	1.35605	1.59977	1.65021		PTEN-/-	0.7821	0.05535
								Mean and SEM values for ARHGAP21 expression
									Mean	Standard error		Student's ttest on ARHGAP21 expression
								Control	1	0		P value	0.0276	*
								PTEN-/-	1.535	0.09082
