# Supplementary material for: PTEN controls glandular morphogenesis through a juxtamembrane β-Arrestin1/ARHGAP21 scaffolding complex
Source: eLife. 2017 Jul 27;6:e24578. doi: 10.7554/eLife.24578 (PMC5576923; doi:10.7554/eLife.24578)
Supplement: Figure 1—figure supplement 4—source data 1. [file elife-24578-fig1-figsupp4-data1.xlsx]

## Sheet: Sheet1
Figure 1 supplement 4 changes of membrane β-Arrestin1 densitometry ADU LPA versus vehicle only treated control PTEN+/+ and PTEN-/- HCT116 cells. Experiments in Qudraplate.										Mean and SEM values for membrane β-Arrestin1
	VO				LPA						Mean	Standard error		One way Annova test
Control	1	1	1	1	1.89	1.46	1.4	1.71		Control VO	1	0		Overall	P	<0.0001
PTEN-/- HCT116	0.87	0.73	0.42	0.8	1.1	1.02	0.62	1.05		Control LPA	1.615	0.1136		Control VO vs Control LPA	p	**
										PTEN-/- VO	0.705	0.09921		PTEN-/- VO vs PTEN-/- LPA	p	ns
										PTEN-/- LPA	0.9475	0.1104
