# Supplementary material for: PTEN controls glandular morphogenesis through a juxtamembrane β-Arrestin1/ARHGAP21 scaffolding complex
Source: eLife. 2017 Jul 27;6:e24578. doi: 10.7554/eLife.24578 (PMC5576923; doi:10.7554/eLife.24578)
Supplement: Figure 1—source data 1. [file elife-24578-fig1-data1.xlsx]

## Sheet: Sheet1
Figure 1B: ARHGAP21 and β-Arrestin1 expression in Caco-2 and ShPTEN cell lines. Experiments in triplicates								Mean and SEM values for β-Arrestin1 expression				Student's ttest on β-Arrestin1 expression
	Control			Caco-2 ShPTEN					Mean	Standard error		P value	0.0809	ns
β-Arrestin1	1	1	1	0.686234	0.750857	0.907891		Control	1	0
ARHGAP21	1	1	1	1.23426	1.24489	1.3999		Caco-2 ShPTEN	0.7833	0.06566
								Mean and SEM values for ARHGAP21 expression				Student's ttest on ARHGAP21 expression
									Mean	Standard error		P value	0.0318	*
								Control	1	0
								Caco-2 ShPTEN	1.293	0.05352
