# Supplementary material for: PTEN controls glandular morphogenesis through a juxtamembrane β-Arrestin1/ARHGAP21 scaffolding complex
Source: eLife. 2017 Jul 27;6:e24578. doi: 10.7554/eLife.24578 (PMC5576923; doi:10.7554/eLife.24578)
Supplement: Figure 1—source data 2. [file elife-24578-fig1-data2.xlsx]

## Sheet: Sheet1
Figure 1D membrane associated β-Arrestin1 and ARHGAP21 in Caco-2 and ShPTEN cells, expressed as arbitrary densitometry units. Experiments in triplicate.									Mean and SEM values for membrane associated β-Arrestin1
	Control			Caco-2 ShPTEN						Mean	Standard error		Student's ttest on β-Arrestin1 expression in the membrane
Membrane β-Arrestin1	1	1	1	0.905524	0.815623	0.77096			Control	1	0		P value	0.0306	*
Membrane ARHGAP21	1	1	1	1.57143	1.43089	1.42742			Caco-2 ShPTEN	0.8224	0.03182
									Mean and SEM values for membrane associated ARHGAP21
										Mean	Standard error		Student's ttest on ARHGAP21 expression in the membrane
									Control	1	0		P value	0.0098	**
									Caco-2 ShPTEN	1.477	0.04743
