# Supplementary material for: PTEN controls glandular morphogenesis through a juxtamembrane β-Arrestin1/ARHGAP21 scaffolding complex
Source: eLife. 2017 Jul 27;6:e24578. doi: 10.7554/eLife.24578 (PMC5576923; doi:10.7554/eLife.24578)
Supplement: Figure 1—source data 3. [file elife-24578-fig1-data3.xlsx]

## Sheet: Sheet1
Figure1F Changes of membrane associated β-Arrestin1 densitometry ADU LPA vs vehicle only (VO) treated control Caco-2 and ShPTENcells. Experiments in Qudraplates.										Mean and SEM values for membrane β-Arrestin1				One way Annova test
	VO				LPA						Mean	Standard error		Overall	<0.0001
Control	1	1	1	1	1.63	1.62	2	1.72		Control VO	1	0		Control VO vs Control LPA	**
Caco-2 ShPTEN	0.47	0.8	0.7	0.68	0.84	0.94	0.9	1.22		Control LPA	1.743	0.08873		ShPTEN VO vs ShPTEN LPA	*
										Caco-2 ShPTEN	0.6625	0.06933
										Caco-2 ShPTEN LPA	0.975	0.08421
