# Supplementary material for: PTEN controls glandular morphogenesis through a juxtamembrane β-Arrestin1/ARHGAP21 scaffolding complex
Source: eLife. 2017 Jul 27;6:e24578. doi: 10.7554/eLife.24578 (PMC5576923; doi:10.7554/eLife.24578)
Supplement: Figure 2—figure supplement 1—source data 1. [file elife-24578-fig2-figsupp1-data1.xlsx]

## Sheet: Sheet2
Figure 2 supplement 1: Spindle angles in Caco-2 cells after NT or β-Arrestin1 SiRNA knock down. Spindle angles of 15 mitotic figures for each experimental condition																	Overall mean and SEM values for spindle angle in Caco-2 cells
Control	77	86	90	85	68	66	27	74	38	82	22	72	82	80	84			Mean	Standard error		Student's ttest on Spindle angle
β-Arrestin1 SiRNA	11	2	2	71	5	10	5	24	45	67	59	38	22	15	58		Control	68.87	5.653		P value	0.0005	**
																	β-Arrestin1 SiRNA	28.93	6.492
