# Supplementary material for: PTEN controls glandular morphogenesis through a juxtamembrane β-Arrestin1/ARHGAP21 scaffolding complex
Source: eLife. 2017 Jul 27;6:e24578. doi: 10.7554/eLife.24578 (PMC5576923; doi:10.7554/eLife.24578)
Supplement: Figure 2—figure supplement 2—source data 1. [file elife-24578-fig2-figsupp2-data1.xlsx]

## Sheet: Sheet1
Fig 2 Supplement 2 Caco-2 glands with single lumens after transfection. Assays in 50 glands per replicate (N=3). Results expressed as a percentage.							Overall mean and SEM values for % single glands in Caco-2 cells
Control			β-Arrestin1 SiRNA					Mean	Standard error		Student's ttest on Spindle angle
18/50 (36%)	16/50 (32%)	15/50 (30%)	8/50 (16%)	6/50 (12%)	5/50 (10%)		Control	32.67	1.76		P value	0.0012	**
							β-Arrestin1 SiRNA	12.67	1.76
