# Supplementary material for: PTEN controls glandular morphogenesis through a juxtamembrane β-Arrestin1/ARHGAP21 scaffolding complex
Source: eLife. 2017 Jul 27;6:e24578. doi: 10.7554/eLife.24578 (PMC5576923; doi:10.7554/eLife.24578)
Supplement: Figure 2—figure supplement 3—source data 1. [file elife-24578-fig2-figsupp3-data1.xlsx]

## Sheet: Sheet1
Fig 2 Supplement 3 Spindle angles in Caco-2 ShPTEN cells after control or ARHGAP21 SiRNA transfection. Assays in 15 glands for each experimental condition																	Overall mean and SEM values for spindle angle in Caco-2 ShPTEN cells
Control SiRNA	11	2	2	81	5	10	15	24	55	80	59	38	28	15	58			Mean	Standard error		Student's ttest on Spindle angle
ARHGAP21 SiRNA	74	82	90	78	72	56	37	74	36	82	22	72	80	88	84		Control SiRNA	32.2	7.167		P value	0.0021	**
																	ARHGAP21 SiRNA	68.47	5.399
