# Supplementary material for: PTEN controls glandular morphogenesis through a juxtamembrane β-Arrestin1/ARHGAP21 scaffolding complex
Source: eLife. 2017 Jul 27;6:e24578. doi: 10.7554/eLife.24578 (PMC5576923; doi:10.7554/eLife.24578)
Supplement: Figure 2—figure supplement 4—source data 1. [file elife-24578-fig2-figsupp4-data1.xlsx]

## Sheet: Sheet1
Fig 2 Supplement 4. Caco-2 ShPTEN glands with single central lumens after transfection. 50 glands counted per replicate (n=3). Those with single lumens expressed as a percentage.							Overall mean and SEM values for % single glands in Caco-2 ShPTEN cells
Control SiRNA			ARHGAP21 SiRNA					Mean	Standard error		Student's ttest on Single lumen
6/50 (12%)	6/50 (12%)	8/50 (16%)	12/50 (24%)	14/50 (28%)	15/50 (30%)		Control SiRNA	13.33	1.333		P value	0.0067	**
							ARHGAP21 SiRNA	27.33	1.764
