# Supplementary material for: PTEN controls glandular morphogenesis through a juxtamembrane β-Arrestin1/ARHGAP21 scaffolding complex
Source: eLife. 2017 Jul 27;6:e24578. doi: 10.7554/eLife.24578 (PMC5576923; doi:10.7554/eLife.24578)
Supplement: Figure 2—source data 1. [file elife-24578-fig2-data1.xlsx]

## Sheet: Sheet1
Figure 2B Cdc42-GTP ADU in Caco-2 and HCT116 cells after NT or β-Arrestin1 SiRNA transfection. Experiments in triplicates.								Mean and SEM values for Cdc42-GTP in Caco-2
	NT SiRNA			β-Arrestin1 SiRNA					Mean	Standard error		Student's ttest on Cdc42-GTP
Caco-2	1	1	1	0.47	0.6	0.789972		NT SiRNA	1	0		P value	0.0275	*
HCT116	1	1	1	0.58	0.5	0.46		β-Arrestin1 SiRNA	0.62	0.09292
								Mean and SEM values for Cdc42-GTP HCT116
									Mean	Standard error		Student's ttest on Cdc42-GTP
								NT SiRNA	1	0		P value	0.0052	**
								β-Arrestin1 SiRNA	0.5133	0.03528
