# Supplementary material for: PTEN controls glandular morphogenesis through a juxtamembrane β-Arrestin1/ARHGAP21 scaffolding complex
Source: eLife. 2017 Jul 27;6:e24578. doi: 10.7554/eLife.24578 (PMC5576923; doi:10.7554/eLife.24578)
Supplement: Figure 2—source data 2. [file elife-24578-fig2-data2.xlsx]

## Sheet: Sheet1
Figure 2D Cdc42-GTP ADU in Caco-2 ShPTEN and PTEN-/- HCT116 cells after NT or ARHGAP21 SiRNA transfection. Experiments in quadraplates.										Mean and SEM values for Cdc42-GTP in ShPTEN
	NT SiRNA				ARHGAP21 SiRNA						Mean	Standard error		Student's ttest on Cdc42-GTP
ShPTEN	1	1	1	1	1.66	1.35	1.4	1.22		NT SiRNA	1	0		P value	0.0216	*
PTEN-/-	1	1	1	1	1.75	1.38	1.25	1.66		ARHGAP21 SiRNA	1.408	0.09232
										Mean and SEM values for Cdc42-GTP in PTEN-/-
											Mean	Standard error		Student's ttest on Cdc42-GTP
										NT SiRNA	1	0		P value	0.0224	*
										ARHGAP21 SiRNA	1.51	0.1171
