# Supplementary material for: PTEN controls glandular morphogenesis through a juxtamembrane β-Arrestin1/ARHGAP21 scaffolding complex
Source: eLife. 2017 Jul 27;6:e24578. doi: 10.7554/eLife.24578 (PMC5576923; doi:10.7554/eLife.24578)
Supplement: Figure 2—source data 3. [file elife-24578-fig2-data3.xlsx]

## Sheet: Sheet1
Figure 2F Cdc42-GTP intensity (AI) in Caco-2 glands. Intensity was assessed in 10 randomly selected glands for each replicate (n=3) for each experimental condition.												Mean Value of each replicate			Overall mean and SEM values for Cdc42-GTP in ShPTEN
Control (1)	30	31	24	34	32	30	27	33	16	15		27				Mean	Standard error		Student's ttest on Cdc42-GTP
Control (2)	25	20	22	26	18	19	21	17	29	26		22			Control	24.67	1.453		P value	0.0041	**
Control (3)	27	23	28	30	20	25	21	23	27	25		25			β-Arrestin1 SiRNA	14.33	0.8819
β-Arrestin1 SiRNA (1)	18	13	16	22	17	14	19	12	16	11		16
β-Arrestin1 SiRNA (2)	10	8	17	14	17	11	13	18	9	14		13
β-Arrestin1 SiRNA (3)	18	14	17	16	10	11	15	12	13	16		14
