# Supplementary material for: PTEN controls glandular morphogenesis through a juxtamembrane β-Arrestin1/ARHGAP21 scaffolding complex
Source: eLife. 2017 Jul 27;6:e24578. doi: 10.7554/eLife.24578 (PMC5576923; doi:10.7554/eLife.24578)
Supplement: Figure 2—source data 4. [file elife-24578-fig2-data4.xlsx]

## Sheet: Sheet1
Figure 2H Cdc42-GTP (AI) in Caco-2 ShPTEN glands. Assays in 10 glands for each replicate (n=3) in each experimental condition.												Mean Value of each replicate			Overall mean and SEM values for Cdc42-GTP in ShPTEN
Control (1)	12	10	10	8	11	13	7	13	6	7		9.65				Mean	Standard error		Student's ttest on Cdc42-GTP
Control (2)	13	14	13	9	11	12	9	15	14	6		11.52			Control	10.67	0.6667		P value	0.0043	**
Control (3)	8	13	6	5	10	8	12	14	9	11		9.64			ARHGAP21 SiRNA	19.67	0.8819
ARHGAP21 SiRNA (1)	22	25	14	15	17	20	25	21	7	10		20.55
ARHGAP21 SiRNA (2)	30	21	12	16	18	36	20	25	14	13		20.47
ARHGAP21 SiRNA (3)	26	23	14	16	28	16	13	35	14	21		17.59
