# Supplementary material for: PTEN controls glandular morphogenesis through a juxtamembrane β-Arrestin1/ARHGAP21 scaffolding complex
Source: eLife. 2017 Jul 27;6:e24578. doi: 10.7554/eLife.24578 (PMC5576923; doi:10.7554/eLife.24578)
Supplement: Figure 3—figure supplement 2—source data 1. [file elife-24578-fig3-figsupp2-data1.xlsx]

## Sheet: Sheet1
Figure 3 supplement 2 β-Arrestin1 associated ARHGAP21/Total ARHGAP21 (ADU) in PTEN-/-HCT116 cells after transfections. Experiments in quadraplates.													Mean and SEM values for β-Arrestin1 associated ARHGAP21
EV				C2				C2MCBR3						Mean	Standard error		One way Annova test
1	1	1	1	3.33	4.2	4.1	4.05	1.238	1.66	1.09	0.95		Control (EV)	1	0		Overall	P	<0.0001
													C2	3.919	0.1979		EV vs C2	p	**
													C2-MCBR3	1.236	0.1543		EV vs C2-MCBR3	p	ns
								.
