# Supplementary material for: PTEN controls glandular morphogenesis through a juxtamembrane β-Arrestin1/ARHGAP21 scaffolding complex
Source: eLife. 2017 Jul 27;6:e24578. doi: 10.7554/eLife.24578 (PMC5576923; doi:10.7554/eLife.24578)
Supplement: Figure 3—figure supplement 4—source data 1. [file elife-24578-fig3-figsupp4-data1.xlsx]

## Sheet: Sheet1
Figure 3 supplement 4: PLA analysis of β-Arrestin1and PTEN (GFP) interactions expressed as (AI).								Mean and Sem values of PLA values for each transfection				1 way ANNOVA test on the effects of transfection on β-Arrestin1/PTEN PLA signal
HCT116	No AB control	GFP EV control	GFP PTEN CS T383A	GFP PTEN CS4A	GFP-C2	GFP-C2-MCBR3			Mean	Standard error		Overall	< 0.0001
37	0	0	18	0	12	4		No AB control	2.124	0.2505		GFP EV control vs GFP PTEN CS-T383A	***
44	1	12	9	0	13	6		GFP EV control	3.21	0.4767		GFP EV control vs GFP-PTEN CS-A4	ns
28	0	8	52	0	63	6		HCT116	101	4.906		GFP EV control vs GFP- C2	***
14	0	0	13	14	36	0		GFP PTEN CS T383A	69.83	3.669		GFP EV control vs GFP-C2-MCBR3	ns
47	0	0	50	13	37	7		GFP PTEN CS4A	9.619	0.9881
73	0	0	34	13	26	20		GFP-C2	38.3	2.091
23	3	0	0	0	34	0		GFP-C2-MCBR3	8.657	0.8065
48	0	0	20	0	18	4
62	4	0	26	0	11	8
57	0	7	151	14	16	12
53	5	10	45	0	23	48
29	2	0	104	1	10	12
26	1	0	171	0	22	10
23	1	0	38	0	25	7
24	0	0	27	11	20	5
23	0	0	80	0	25	13
41	6	5	53	0	36	10
25	4	2	27	2	13	10
74	2	8	57	10	26	6
78	3	8	123	3	27	7
116	0	0	186	0	17	0
169	2	0	95	5	22	0
37	2	0	54	3	19	5
70	0	0	160	0	14	8
74	0	0	33	0	18	15
87	5	0	44	6	21	7
75	4	0	67	6	30	3
74	0	0	37	0	23	0
36	0	0	49	0	38	3
152	3	0	21	0	43	3
151	3	0	31	0	10	0
64	2	0	44	0	16	0
37	0	0	17	2	19	8
120	1	0	35	0	34	5
82	8	0	133	0	65	8
161	7	12	20	16	50	4
121	0	14	28	22	50	5
118	1	4	71	13	10	5
125	5	3	41	9	12	2
109	1	2	30	15	32	9
145	0	3	29	13	35	7
105	0	5	79	15	52	0
158	6	6	72	0	55	5
223	8	2	73	1	31	7
214	1	2	55	4	37	8
169	5	0	96	5	10	8
181	0	5	70	3	45	7
150	0	19	101	2	35	5
175	0	27	115	3	10	6
148	1	3	110	15	30	13
178	3	6	128	17	33	4
165	0	0	79	10	13	2
125	4	3	47	12	48	0
120	0	0	50	14	18	11
92	0	0	96	19	33	12
102	8	0	70	1	74	21
116	4	0	106	29	50	18
102	3	1	131	24	40	11
145	1	6	74	0	25	10
134	1	22	114	13	23	11
138	3	6	73	11	78	7
182	0	1	120	67	88	13
210	0	11	123	19	40	13
183	0	5	131	26	21	6
175	1	4	94	28	19	10
72	2	4	96	20	87	15
98	2	1	54	22	74	20
69	0	5	116	35	22	19
83	8	0	75	14	38	0
74	9	0	46	23	22	12
89	1	0	88	9	21	6
113	0	4	43	16	22	0
96	3	1	80	13	14	0
242	6	0	90	11	12	22
40	5	1	57	16	45	0
96	0	1	79	14	43	6
80	0	1	135	16	37	0
91	0	1	57	19	47	12
87	2	1	48	10	72	1
154	2	2	34	12	83	5
133	3	2	54	14	89	9
137	0	0	54	20	68	37
99	1	0	31	14	78	34
126	0	4	88	14	63	0
99	6	12	76	1	67	1
155	0	2	54	20	70	12
106	1	2	51	4	81	10
83	0	12	93	14	50	13
73	7	11	35	6	38	6
39	7	10	120	0	55	6
107	0	2	62	0	47	5
130	2	1	92	3	45	0
110	3	7	108	0	33	7
119	0	0	71	2	72	0
119	4	0	63	8	83	4
138	0	2	72	24	46	2
40	6	0	81	0	37	15
96	0	0	42	19	37	36
79	0	3	27	20	39	10
96	2	2	92	12	73	17
97	5	2	44	14	49	21
78	0	5	84	8	34	10
83	10	2	76	4	46	12
60	1	0	67	5	55	6
74	0	2	67	5	49	18
