# Supplementary material for: PTEN controls glandular morphogenesis through a juxtamembrane β-Arrestin1/ARHGAP21 scaffolding complex
Source: eLife. 2017 Jul 27;6:e24578. doi: 10.7554/eLife.24578 (PMC5576923; doi:10.7554/eLife.24578)
Supplement: Figure 3—figure supplement 5—source data 1. [file elife-24578-fig3-figsupp5-data1.xlsx]

## Sheet: Sheet1
Figure 3 supplement 5: PLA analysis of β-Arrestin1 and ARHGAP21 interactions expressed as (AI).								Mean and Sem values of PLA values for each transfection				1 way ANNOVA test on the effects of transfection on β-Arrestin1/PTEN PLA signal
HCT116	No Ab control	GFP EV-control	GFP-C2	GFP-C2-MCBR3	GFP-wt PTEN	GFP-PTEN-MCBR3			Mean	Standad error		Overall	< 0.0001
127	0	6	40	22	70	5		No AB control	0.3913	0.09135		GFP EV Control vs C2	***
130	0	3	55	27	78	14		GFP EV control	7.583	0.5617		GFP EV Control vs MCBR3	ns
147	1	10	31	13	84	14		HCT116	122.8	3.781		GFP EV Control vs FL PTEN	***
175	0	8	53	26	34	24		GFP wt PTEN	63.7	2.351		GFP EV Control vs PTEN-MCBR3	**
77	0	7	57	33	50	26		GFP PTEN MCBR3	18.53	0.9016
201	0	2	59	22	73	23		GFP-C2	44.23	1.924
172	0	9	57	35	84	38		GFP-C2-MCBR3	13.47	0.8832
170	0	4	59	14	58	28
215	1	3	36	36	71	42
160	0	9	41	27	63	33
213	1	10	40	14	109	24
124	0	7	37	17	83	33
182	0	3	51	14	59	25
105	0	20	58	34	67	22
177	0	6	76	17	76	20
196	0	10	30	8	87	17
127	0	0	63	20	67	21
156	0	3	84	7	60	23
109	0	6	66	19	88	31
77	1	5	39	3	62	10
67	0	5	45	6	65	11
77	0	8	69	13	96	13
190	0	7	58	8	111	21
184	0	9	60	12	102	21
201	0	5	69	8	37	22
108	1	14	40	4	127	22
97	0	8	53	8	98	23
117	0	10	50	12	89	24
54	0	9	77	13	111	29
85	0	7	64	14	39	18
117	0	6	53	20	94	13
148	0	7	50	25	101	11
105	0	11	11	6	61	11
81	0	6	43	18	91	6
100	0	11	49	18	81	10
122	1	13	74	18	90	10
168	0	16	41	19	78	12
134	5	15	65	9	70	13
144	1	14	39	6	80	17
140	0	14	69	8	63	8
112	0	11	82	9	63	29
134	1	10	37	6	93	8
138	0	7	63	5	118	10
92	0	6	69	18	104	12
154	0	5	57	8	66	10
123	2	5	26	5	74	13
106	0	5	17	11	98	8
166	0	6	29	5	91	2
155	0	11	104	21	81	13
117	0	2	83	17	88	14
130	0	2	21	10	79	22
121	3	8	44	0	70	26
150	1	5	19	3	80	23
140	0	5	62	7	63	36
141	1	21	40	2	63	28
134	0	16	53	13	91	42
127	0	19	50	5	81	30
128	0	14	37	20	93	24
146	2	12	64	20	81	32
161	0	29	53	3	70	25
178	0	18	50	0	80	22
156	1	23	56	20	66	19
156	0	19	45	0	63	17
200	0	13	80	3	58	15
