# Supplementary material for: PTEN controls glandular morphogenesis through a juxtamembrane β-Arrestin1/ARHGAP21 scaffolding complex
Source: eLife. 2017 Jul 27;6:e24578. doi: 10.7554/eLife.24578 (PMC5576923; doi:10.7554/eLife.24578)
Supplement: Figure 3—source data 1. [file elife-24578-fig3-data1.xlsx]

## Sheet: Sheet1
Figure 3B β-Arrestin1 associated ARHGAP21/Total ARHGAP21 (ADU) in Caco-2 or Caco-2 ShPTEN, HCT116 and PTEN-/- cells. Experiments in quadraplates.									Mean and SEM values for β-Arrestin1 associated ARHGAP21 in Caco-2 and ShPTEN
Caco-2 (control)				ShPTEN						Mean	Standard error		Student's ttest on associations
1	1	1	1	0.382572	0.342088	0.31746	0.341869		Control	1	0		P value	0.0008	**
HCT116 (control)				PTEN-/-					ShPTEN	0.346	0.01349
1	1	1	1	0.420354	0.4125	0.412121	0.334506
									Mean and SEM values forβ-Arrestin1 associated ARHGAP21 in HCT116 and PTEN-/-
										Mean	Standard error		Student's ttest on associations
									Control	1	0		P value	< 0.0001	**
									PTEN-/-	0.3949	0.02021
