# Supplementary material for: PTEN controls glandular morphogenesis through a juxtamembrane β-Arrestin1/ARHGAP21 scaffolding complex
Source: eLife. 2017 Jul 27;6:e24578. doi: 10.7554/eLife.24578 (PMC5576923; doi:10.7554/eLife.24578)
Supplement: Figure 3—source data 2. [file elife-24578-fig3-data2.xlsx]

## Sheet: Sheet1
Figure 3E β-Arrestin1 associated ARHGAP21/Total ARHGAP21 (ADU) in Caco-2 ShPTEN cells after transfections. Experiments in 5 replicates.																	Mean and SEM values for β-Arrestin1 associated ARHGAP21
Control (EV)					C2					C2-MCBR3								Mean	Standard error		One way Annova test
1	1	1	1	1	2.5	2.63	2.66	2.53	2.21	0.87	1.06	1.21	0.91	1.1			Control (EV)	1	0		Overall	P	<0.0001
																	C2	2.506	0.0789		EV vs C2	p	**
																	C2-MCBR3	1.03	0.06263		EV vs C2-MCBR3	p	ns
