# Supplementary material for: PTEN controls glandular morphogenesis through a juxtamembrane β-Arrestin1/ARHGAP21 scaffolding complex
Source: eLife. 2017 Jul 27;6:e24578. doi: 10.7554/eLife.24578 (PMC5576923; doi:10.7554/eLife.24578)
Supplement: Figure 4—figure supplement 2—source data 1. [file elife-24578-fig4-figsupp2-data1.xlsx]

## Sheet: Sheet1
Figure 4 supplement 2 β-Arrestin1 (ADU) in PTEN-/-HCT116 cells after trensfections. Experiments in triplicate.					Mean and SEM values for β-Arrestin1
Control (EV)	1	1	1			Mean	Standard error		One way Annova test
C2	1.25	1.1679	1.30176		Control (EV)	1	0		Overall	P	<0.0001
C2-MCBR3	1.07	1.23	1.04		C2	1.24	0.03897		EV vs C2	p	*
					C2-MCBR3	1.11	0.06		EV vs C2-MCBR3	p	ns
