# Supplementary material for: PTEN controls glandular morphogenesis through a juxtamembrane β-Arrestin1/ARHGAP21 scaffolding complex
Source: eLife. 2017 Jul 27;6:e24578. doi: 10.7554/eLife.24578 (PMC5576923; doi:10.7554/eLife.24578)
Supplement: Figure 4—figure supplement 3—source data 1. [file elife-24578-fig4-figsupp3-data1.xlsx]

## Sheet: Sheet1
Figure 4 supplement 3 ARHGAP21 (ADU) in PTEN-/-HCT116 cells after trensfections. Experiments in quadraplate.						Mean and SEM values for ARHGAP21
Control (EV)	1	1	1	1			Mean	Standard error		One way Annova test
C2	0.75	0.721657	0.800381	0.75627		Control (EV)	1	0		Overall	P	<0.0001
C2-MCBR3	0.9173	1.04112	1.22	0.9834		C2	0.7571	0.01628		EV vs C2	p	**
						C2-MCBR3	1.04	0.06497		EV vs C2-MCBR3	p	ns
