# Supplementary material for: PTEN controls glandular morphogenesis through a juxtamembrane β-Arrestin1/ARHGAP21 scaffolding complex
Source: eLife. 2017 Jul 27;6:e24578. doi: 10.7554/eLife.24578 (PMC5576923; doi:10.7554/eLife.24578)
Supplement: Figure 4—figure supplement 5—source data 1. [file elife-24578-fig4-figsupp5-data1.xlsx]

## Sheet: Sheet1
Figure 4 supplement 5 Membrane β-Arrestin1/Total β-Arrestin1 (ADU) in PTEN-/-HCT116 cells. Experiments in triplicate					Mean and SEM for membrane associated β-Arrestin1				Student's ttest on membrane association
Control (EV)	1	1	1			Mean	Standard error		P	0.04	*
C2	1.1	1.215	1.1758		Control (EV)	1	0
					C2	1.164	0.03375
