# Supplementary material for: PTEN controls glandular morphogenesis through a juxtamembrane β-Arrestin1/ARHGAP21 scaffolding complex
Source: eLife. 2017 Jul 27;6:e24578. doi: 10.7554/eLife.24578 (PMC5576923; doi:10.7554/eLife.24578)
Supplement: Figure 4—figure supplement 6—source data 1. [file elife-24578-fig4-figsupp6-data1.xlsx]

## Sheet: Sheet1
Figure 4 supplement 6 Membrane ARHGAP21/Total ARHGAP21 (ADU) in PTEN-/-HCT116 cells after transfection. Experiments in quadraplates.						Mean and SEM for membrane associated ARHGAP21				Student's ttest on membrane association
Control (EV)	1	1	1	1			Mean	Standard error		P	0.0094	**
C2	0.746667	0.8921	0.7988	0.834		Control (EV)	1	0
						C2	0.8179	0.03056
