# Supplementary material for: PTEN controls glandular morphogenesis through a juxtamembrane β-Arrestin1/ARHGAP21 scaffolding complex
Source: eLife. 2017 Jul 27;6:e24578. doi: 10.7554/eLife.24578 (PMC5576923; doi:10.7554/eLife.24578)
Supplement: Figure 4—source data 1. [file elife-24578-fig4-data1.xlsx]

## Sheet: Sheet1
Figure 4B β-Arrestin1 (ADU) in ShPTEN cells after trensfections. Experiments in triplicate.					Mean and SEM values for β-Arrestin1
Control (EV)	1	1	1			Mean	Standard error		One way Annova test
C2	1.275	1.18864	1.23061		Control (EV)	1	0		Overall	P	<0.0001
C2-MCBR3	1.04167	1.10417	1.08333		C2	1.231	0.02493		EV vs C2	p	**
					C2-MCBR3	1.076	0.01837		EV vs C2-MCBR3	p	ns
