# Supplementary material for: PTEN controls glandular morphogenesis through a juxtamembrane β-Arrestin1/ARHGAP21 scaffolding complex
Source: eLife. 2017 Jul 27;6:e24578. doi: 10.7554/eLife.24578 (PMC5576923; doi:10.7554/eLife.24578)
Supplement: Figure 4—source data 2. [file elife-24578-fig4-data2.xlsx]

## Sheet: Sheet1
Figure 4C ARHGAP21 (ADU) in ShPTEN cells after trensfections. Experiments in quadraplate.						Mean and SEM values for ARHGAP21
Control (EV)	1	1	1	1			Mean	Standard error		One way Annova test
C2	0.75	0.81	0.794	0.8573		Control (EV)	1	0		Overall	P	<0.0001
C2-MCBR3	0.86	0.95	1	0.978723		C2	0.8028	0.02215		EV vs C2	p	**
						C2-MCBR3	0.9472	0.03081		EV vs C2-MCBR3	p	ns
