# Supplementary material for: PTEN controls glandular morphogenesis through a juxtamembrane β-Arrestin1/ARHGAP21 scaffolding complex
Source: eLife. 2017 Jul 27;6:e24578. doi: 10.7554/eLife.24578 (PMC5576923; doi:10.7554/eLife.24578)
Supplement: Figure 4—source data 3. [file elife-24578-fig4-data3.xlsx]

## Sheet: Sheet1
Figure 4E Membrane associated β-Arrestin1/ Total β-Arrestin1 (ADU) in Caco-2 ShPTEN cells.Experiments in triplicate					Mean and SEM for membrane associated β-Arrestin1				Student's ttest on membrane association
Control (EV)	1	1	1			Mean	Standard error		P	0.0439	*
C2	1.34902	1.16202	1.24		Control (EV)	1	0
					C2	1.25	0.05423
