# Supplementary material for: PTEN controls glandular morphogenesis through a juxtamembrane β-Arrestin1/ARHGAP21 scaffolding complex
Source: eLife. 2017 Jul 27;6:e24578. doi: 10.7554/eLife.24578 (PMC5576923; doi:10.7554/eLife.24578)
Supplement: Figure 4—source data 4. [file elife-24578-fig4-data4.xlsx]

## Sheet: Sheet1
Figure 4F Membrane ARHGAP21/Total ARHGAP21 (ADU) in Caco-2 ShPTEN cells after transfection. Experiments in triplicate					Mean and SEM for membrane associated ARHGAP21				Student's ttest on membrane association
Control	1	1	1			Mean	Standard error		P	0.0375	*
C2	0.52	0.699872	0.377834		Control	1	0
					C2	0.5326	0.09318
