# Supplementary material for: PTEN controls glandular morphogenesis through a juxtamembrane β-Arrestin1/ARHGAP21 scaffolding complex
Source: eLife. 2017 Jul 27;6:e24578. doi: 10.7554/eLife.24578 (PMC5576923; doi:10.7554/eLife.24578)
Supplement: Figure 4—source data 5. [file elife-24578-fig4-data5.xlsx]

## Sheet: Sheet1
Figure 4H Membrane β-Arrestin1 associated ARHGAP21/membrane ARHGAP21 (ADU) in Caco-2 ShPTEN cells after transfection. Experiments in 5 replicates							Mean and SEM values for β-Arrestin1 associated ARHGAP21 after transfections				1 way Annova test on effect of transfection
Control (EV)	1	1	1	1	1			Mean	Standard error		Overall	p	<0.0001
C2	7.93333	6.48718	6.58139	5.33333	5.03774		Control (EV)	1	0		EV vs C2	p	***
C2-MCBR3	1.15493	1.11111	0.836538	1.46341	1.69841		C2	6.275	0.5151		EV vs C2-MCBR3	p	ns
							C2-MCBR3	1.253	0.1493
