# Supplementary material for: PTEN controls glandular morphogenesis through a juxtamembrane β-Arrestin1/ARHGAP21 scaffolding complex
Source: eLife. 2017 Jul 27;6:e24578. doi: 10.7554/eLife.24578 (PMC5576923; doi:10.7554/eLife.24578)
Supplement: Figure 4—source data 6. [file elife-24578-fig4-data6.xlsx]

## Sheet: Sheet1
Figure 4J Membrane β-Arrestin1 associated ARHGAP21/ Membrane ARHGAP21 (ADU) in PTEN-/-HCT116 cells. Experiments in triplicate					Mean and SEM values for β-Arrestin1 associated ARHGAP21 after transfections				1 way Annova test on effect of transfection
Control	1	1	1			Mean	Standard error		Overall	p	<0.0001
C2	8.53333	7.11111	6.3415		EV	1	0		EV vs C2	p	***
C2-MCBR3	3.19355	2.25807	2.03913		C2	7.329	0.642		EV vs C2-MCBR3	p	ns
wt PTEN	12.6496	12.8385	13.2988		C2-MCBR3	2.497	0.354		EV vs wt PTEN	p	***
PTEN-MCBR3	3.49655	2.77586	3.17966		wt PTEN	12.93	0.1928		EV vs PTEN-MCBR3	p	*
					PTEN-MCBR3	3.151	0.2085
