# Supplementary material for: PTEN controls glandular morphogenesis through a juxtamembrane β-Arrestin1/ARHGAP21 scaffolding complex
Source: eLife. 2017 Jul 27;6:e24578. doi: 10.7554/eLife.24578 (PMC5576923; doi:10.7554/eLife.24578)
Supplement: Figure 5—figure supplement 1—source data 1. [file elife-24578-fig5-figsupp1-data1.xlsx]

## Sheet: Sheet1
Figure 5 supplement 1 β-Arrestin1 intensity immunoreactivity (AI) in Caco-2 and Caco-2 ShPTEN glands. Intensity assessed in 10 glands for each replicate (n=3) for each transfection.												Mean value of each replicate			Overal mean and SEM values for each condition				Student's ttest on β-Arrestin1
Control (1)	28	38	24	17	28	22	23	31	18	22		Control (1)	25.1			Mean	Standard error		P	<0.04	*
Control (2)	16	18	15	10	22	14	25	15	23	12		Control (2)	17		Control	24.33	4.055
Control (3)	28	25	38	33	25	31	35	29	36	30		Control (3)	31		ShPTEN	11	1.155
ShPTEN (1)	8	9	18	8	7	15	9	10	12	13		ShPTEN (1)	10.9
ShPTEN (2)	13	13	8	15	14	17	17	9	11	15		ShPTEN (2)	13.2
ShPTEN (3)	7	6	17	5	15	9	5	4	11	6		ShPTEN (3)	8.5
