# Supplementary material for: PTEN controls glandular morphogenesis through a juxtamembrane β-Arrestin1/ARHGAP21 scaffolding complex
Source: eLife. 2017 Jul 27;6:e24578. doi: 10.7554/eLife.24578 (PMC5576923; doi:10.7554/eLife.24578)
Supplement: Figure 5—figure supplement 2—source data 1. [file elife-24578-fig5-figsupp2-data1.xlsx]

## Sheet: Sheet1
Figure 5 supplement 2 ARHGAP21 intensity immunoreactivity (AI) in Caco-2 and Caco-2 ShPTEN glands. Intensity assessed in 10 glands for each replicate (n=3) for each transfection.												Mean value of each replicate			Overal mean and SEM values for each condition				Student's ttest on ARHGAP21 AI
Control (1)	5	11	8	6	13	6	8	12	11	10		Control (1)	9			Mean	Standard error		P	0.02	*
Control (2)	6	5	7	9	11	10	6	5	8	8		Control (2)	7.5		Control	8	0.5774
Control (3)	6	5	7	7	5	4	10	9	8	7		Control (3)	6.8		ShPTEN	17	2.646
ShPTEN (1)	19	15	17	14	22	26	18	15	16	18		ShPTEN (1)	18
ShPTEN (2)	15	10	9	8	14	15	13	10	9	15		ShPTEN (2)	11.8
ShPTEN (3)	29	18	21	20	15	23	19	16	21	28		ShPTEN (3)	21
