# Supplementary material for: PTEN controls glandular morphogenesis through a juxtamembrane β-Arrestin1/ARHGAP21 scaffolding complex
Source: eLife. 2017 Jul 27;6:e24578. doi: 10.7554/eLife.24578 (PMC5576923; doi:10.7554/eLife.24578)
Supplement: Figure 5—figure supplement 4—source data 1. [file elife-24578-fig5-figsupp4-data1.xlsx]

## Sheet: Sheet1
Figure 5 Supplement 4 Caco-2 ShPTEN glands with single central lumens. Lumens counted in 50 glands and edpressed as a percentage					Overall mean and SEM values for % single glands in Caco-2 ShPTEN cells				One way Annova test on single glands after transfections
Control (EV)	5/50 (10%)	6/50 (12%)	7/50 (14%)			Mean	Std error		Overal	p	0.0147
C2	12/50 (24%)	9/50 (18%)	10/50 (20%)		Control (EV)	12	1.155		Control vs C2	p	*
MCBR3	6/50 (12%)	5/50 (10%)	8/50 (16%)		C2	20.67	1.764		Control vs C2-MCBR3	p	ns
					C2-MCBR3	12.67	1.764
