# Supplementary material for: PTEN controls glandular morphogenesis through a juxtamembrane β-Arrestin1/ARHGAP21 scaffolding complex
Source: eLife. 2017 Jul 27;6:e24578. doi: 10.7554/eLife.24578 (PMC5576923; doi:10.7554/eLife.24578)
Supplement: Figure 5—figure supplement 6—source data 1. [file elife-24578-fig5-figsupp6-data1.xlsx]

## Sheet: Sheet1
Figure 5 Supplement 6 Caco-2 ShPTEN glands with single lumens after transfection. Assays in 50 glands per replicate (N=3). Results expressed as a percentage.							Overall mean and SEM values for % single glands in ShPTEN
Control			ShR PTEN					Mean	Standard error		Student's ttest on % single lumen
5/50 (10%)	4/50 (8%)	8/50 (16%)	15/50 (30%)	13/50 (26%)	18/50 (36%)		Control	11.33	2.404		P value	0.0012	**
							ShR PTEN	30.67	2.906
