# Supplementary material for: PTEN controls glandular morphogenesis through a juxtamembrane β-Arrestin1/ARHGAP21 scaffolding complex
Source: eLife. 2017 Jul 27;6:e24578. doi: 10.7554/eLife.24578 (PMC5576923; doi:10.7554/eLife.24578)
Supplement: Figure 5—source data 1. [file elife-24578-fig5-data1.xlsx]

## Sheet: Sheet1
Figure 5D Membrane β-Arrestin1 intensity (AI) in Caco-2 ShPTEN glands after transfection. Intensity assessed in 10 glands for each replicate (n=3) for each transfection.												Mean values for membrane β-Arrestin1 in each replicate			Overal, mean and SEM values for membrane β-Arrestin1				One way Annova for effects of transfections on β-Arrestin1
Control (1)	5	4	8	10	5	8	4	6	3	9			Mean			Mean	Standar error		Overall	p	0.0008
Control (2)	13	10	11	18	9	12	15	13	18	10		Control (1)	6.2		Control	9	2.082		Control vs C2	p	**
Control (3)	6	12	6	8	8	10	5	7	11	7		Control (2)	12.9		C2	23.33	1.202		Control vs C2-MCBR3	p	ns
C2 (1)	22	28	27	20	31	21	24	25	23	29		Control (3)	8		C2-MCBR3	6.333	1.667
C2 (2)	15	32	28	18	22	25	24	30	21	27		C2 (1)	25
C2 (3)	25	20	28	18	23	17	19	26	21	17		C2 (2)	24.2
C2-MCBR3 (1)	11	6	10	8	5	9	6	9	8	10		C2 (3)	21.4
C2-MCBR3 (2)	10	7	5	9	6	5	11	8	10	7		C2-MCBR3 (1)	8.2
C2-MCBR3 (3)	2	1	2	7	5	2	4	3	5	3		C2-MCBR3 (2)	7.8
												C2-MCBR3 (3)	3.4
