# Supplementary material for: PTEN controls glandular morphogenesis through a juxtamembrane β-Arrestin1/ARHGAP21 scaffolding complex
Source: eLife. 2017 Jul 27;6:e24578. doi: 10.7554/eLife.24578 (PMC5576923; doi:10.7554/eLife.24578)
Supplement: Figure 5—source data 2. [file elife-24578-fig5-data2.xlsx]

## Sheet: Sheet1
Figure 5F Spindle angle in Caco-2 ShPTEN glands after transfection with control or C2 or C2-MCBR3 constructs. Spinlde angles of 15 mitotic figures per transfection.																											Mean and SEM values for spindle angle after transfections				One way Annova on effect of transfection on spindle angle
Control (EV)	11	2	2	81	5	10	15	24	55	80	59	38	28	15	58	23	10	76	10	13	67	77	14	15	14			Mean	Standard error		Overall	p	<0.0001
C2	77	86	90	72	68	56	27	74	38	82	22	68	82	80	78	56	77	86	36	28	69	56	72	78	85		Control (EV)	32.08	5.526		Control vs C2	p	**
C2-MCBR3	16	28	30	18	37	11	2	2	81	5	10	31	24	55	43	59	38	28	15	58	27	10	76	10	13		C2	65.72	4.085		Control vs C2MCBR3	p	ns
																											C2-MCBR3	29.08	4.452
