# Supplementary material for: PTEN controls glandular morphogenesis through a juxtamembrane β-Arrestin1/ARHGAP21 scaffolding complex
Source: eLife. 2017 Jul 27;6:e24578. doi: 10.7554/eLife.24578 (PMC5576923; doi:10.7554/eLife.24578)
Supplement: Figure 6—figure supplement 2—source data 1. [file elife-24578-fig6-figsupp2-data1.xlsx]

## Sheet: Sheet1
Figure 6 supplement 2 β-Arrestin1 associated ARHGAP21 (ADU) in HCT116 cells after treatment. Experiments in triplicate					Mean and SEM for β-Arrestin1 associated ARHGAP21				Student's ttest on association
Control pep	1	1	1			Mean	Standard error		P	0.0198	*
pep24	0.390625	0.247312	0.546763		Control pep	1	0
					pep24	0.3949	0.08647
