# Supplementary material for: PTEN controls glandular morphogenesis through a juxtamembrane β-Arrestin1/ARHGAP21 scaffolding complex
Source: eLife. 2017 Jul 27;6:e24578. doi: 10.7554/eLife.24578 (PMC5576923; doi:10.7554/eLife.24578)
Supplement: Figure 6—figure supplement 4—source data 1. [file elife-24578-fig6-figsupp4-data1.xlsx]

## Sheet: Sheet1
Figure 6 supplement 4 Cdc42-GTP (ADU) in HCT116 cells after treatment. Experiments in triplicate					Mean and SEM for Cdc42-GTP levels				Student's ttest on association
Control pep	1	1	1			Mean	Standard error		P	0.0016	**
pep24	0.48	0.4444	0.402985		Control pep	1	0
					pep24	0.4425	0.02225
