# Supplementary material for: PTEN controls glandular morphogenesis through a juxtamembrane β-Arrestin1/ARHGAP21 scaffolding complex
Source: eLife. 2017 Jul 27;6:e24578. doi: 10.7554/eLife.24578 (PMC5576923; doi:10.7554/eLife.24578)
Supplement: Figure 6—figure supplement 5—source data 1. [file elife-24578-fig6-figsupp5-data1.xlsx]

## Sheet: Sheet1
Figure 6 supplement 5 Spindle angle in Caco-2 glands after treatment. Spinlde angles calculated for 15 mitotic figures per treatment																	Overall mean and SEM values for spindle angle in Caco-2 cells
Control pep	77	86	88	85	68	66	27	74	38	82	22	72	82	80	64			Mean	Standard error		Student's ttest on Spindle angle
pep24	11	12	21	56	5	10	5	24	54	46	59	38	18	15	48		Control pep	67.4	5.518		P value	0.0004	***
																	pep24	28.13	5.12
