# Supplementary material for: PTEN controls glandular morphogenesis through a juxtamembrane β-Arrestin1/ARHGAP21 scaffolding complex
Source: eLife. 2017 Jul 27;6:e24578. doi: 10.7554/eLife.24578 (PMC5576923; doi:10.7554/eLife.24578)
Supplement: Figure 6—figure supplement 6—source data 1. [file elife-24578-fig6-figsupp6-data1.xlsx]

## Sheet: Sheet1
Figure 6 supplement 6 Caco-2 glands with single central lumens after treatment. Lumens assessed in 50 glands and expressed as a percentage					Overall mean and SEM values for % single glands in Caco-2 cells
Control pep	18/50 (36%)	19/50 (38%)	16/50 (32%)			Mean	Standard error		Student's ttest on Spindle angle
pep24	10/50 (20%)	12/50 (24%)	9/50 (18%)		Control pep	35.33	1.764		P value	0.0266	**
					pep24	20.67	1.764
