# Supplementary material for: PTEN controls glandular morphogenesis through a juxtamembrane β-Arrestin1/ARHGAP21 scaffolding complex
Source: eLife. 2017 Jul 27;6:e24578. doi: 10.7554/eLife.24578 (PMC5576923; doi:10.7554/eLife.24578)
Supplement: Figure 6—source data 1. [file elife-24578-fig6-data1.xlsx]

## Sheet: Sheet1
Figure 6B Densitometry values of changes in Cdc42-GTP following PTEN CS-T383A and PTEN CS-A4 transfection (ADU). Experiments in triplicates					Mean and SEM values for Cdc42-GTP levels after transfections				One way Annova test on effect of transfection
Control	1	1	1			Mean	Standard error		Overall	p	0.0078
PTEN CS-A4	0.839761	1.24021	0.700093		Control	1	0		Control vs CS-A4	p	ns
PTEN CS-T383A	1.47474	1.85025	1.59981		PTEN CS-A4	0.9267	0.1618		Control vs CS-T383A	p	**
					PTEN CS-T383A	1.642	0.1102
