# Supplementary material for: PTEN controls glandular morphogenesis through a juxtamembrane β-Arrestin1/ARHGAP21 scaffolding complex
Source: eLife. 2017 Jul 27;6:e24578. doi: 10.7554/eLife.24578 (PMC5576923; doi:10.7554/eLife.24578)
Supplement: Figure 6—source data 2. [file elife-24578-fig6-data2.xlsx]

## Sheet: Sheet1
Figure 6E β-Arrestin1 associated ARHGAP21 (ADU) in Caco-2 cells after treatment. Experiments in triplicate					Mean and SEM for β-Arrestin1 associated ARHGAP21				Student's ttest on association
Control pep	1	1	1			Mean	Standard error		P	0.0033	**
pep24	0.647887	0.58	0.641304		Control pep	1	0
					pep24	0.6231	0.02162
