# Supplementary material for: PTEN controls glandular morphogenesis through a juxtamembrane β-Arrestin1/ARHGAP21 scaffolding complex
Source: eLife. 2017 Jul 27;6:e24578. doi: 10.7554/eLife.24578 (PMC5576923; doi:10.7554/eLife.24578)
Supplement: Figure 6—source data 3. [file elife-24578-fig6-data3.xlsx]

## Sheet: Sheet1
Figure 6G Cdc42-GTP (ADU) in Caco-2 cells after treatment. Experiments in triplicate					Mean and SEM for Cdc42-GTP levels				Student's ttest on association
Control pep	1	1	1			Mean	Standard error		P	0.0105	*
pep24	0.444388	0.576923	0.393939		Control pep	1	0
					pep24	0.4718	0.05456
