# Supplementary material for: PTEN controls glandular morphogenesis through a juxtamembrane β-Arrestin1/ARHGAP21 scaffolding complex
Source: eLife. 2017 Jul 27;6:e24578. doi: 10.7554/eLife.24578 (PMC5576923; doi:10.7554/eLife.24578)
Supplement: Figure 7—source data 1. [file elife-24578-fig7-data1.xlsx]

## Sheet: Sheet1
Figure 7B Spindle angle in Organoids after treatment. Spindle angles calculated from 30 mitotic figures per treatment																																Overall mean and SEM values for spindle angle in organoids
Control pep	77	86	88	85	68	76	6	87	15	84	2	86	88	82	79	68	85	89	84	89	71	5	89	46	81	8	87	85	90	68			Mean	Std error		Student's ttest on Spindle angle
pep24	11	12	21	56	15	10	5	24	54	46	59	38	18	25	45	13	15	22	57	13	11	28	27	54	47	52	33	39	28	56		Control pep	68.47	5.366		P value	<0.0001	***
																																pep24	31.13	3.2
