# Supplementary material for: PTEN controls glandular morphogenesis through a juxtamembrane β-Arrestin1/ARHGAP21 scaffolding complex
Source: eLife. 2017 Jul 27;6:e24578. doi: 10.7554/eLife.24578 (PMC5576923; doi:10.7554/eLife.24578)
Supplement: Figure 7—source data 2. [file elife-24578-fig7-data2.xlsx]

## Sheet: Sheet1
Fig 7C Organoids with single central lumen after treatment. In each replicate (n=3), in each experimental condition 10 organoids were studied and the number with single lumens were expressed as a percentage (%)					Overall mean and SEM values for % single glands in Caco-2 cells
Control pep	8/10 (80%)	9/10 (90%)	7/10 (70%)			Mean	Standard error		Student's ttest on % single lumen
pep24	3/10 (30%)	4/10 (40%)	4/10 (40%)		Control pep	80	5.774		P value	0.039	*
					pep24	36.67	3.333
